# Supplementary material for: Recurrent Somatic Copy Number Alterations and Their Association with Oncogene Expression Levels in High-Grade Ovarian Serous Carcinoma
Source: MDPI journal article supplement (doi:10.3390/life13112192), 2023-11-10
Supplement: s1 [file s1]

**Table S4: Contingency Tables for Association with Age at Diagnosis**

A. *TBL1XR1*; B. *PIK3CA*; C. *UBR5*; D. *EIF3E*; E. *RAD21*; F. *EXT1*; G. *RECQL4*; H. *KRAS*; I. *PRKACA*; J. *BRD4*; K. *TPM4*

**(A)** *TBL1XR1* ( $p = 0.2251$ )

|       | Amplified | Not Amplified | Total |
|-------|-----------|---------------|-------|
| < 55  | 26        | 68            | 94    |
| ≥ 55  | 35        | 133           | 168   |
| Total | 61        | 201           | 262   |

**(B)** *PIK3CA* ( $p = 0.0896$ )

|       | Amplified | Not Amplified | Total |
|-------|-----------|---------------|-------|
| < 55  | 27        | 67            | 94    |
| ≥ 55  | 32        | 136           | 168   |
| Total | 59        | 203           | 262   |

**(C)** *UBR5* ( $p = 0.0665$ )

|       | Amplified | Not Amplified | Total |
|-------|-----------|---------------|-------|
| < 55  | 19        | 75            | 94    |
| ≥ 55  | 19        | 149           | 168   |
| Total | 38        | 224           | 262   |

**(D)** *EIF3E* ( $p = 7.077e-05$ )

|       | Amplified | Not Amplified | Total |
|-------|-----------|---------------|-------|
| < 55  | 31        | 63            | 94    |
| ≥ 55  | 20        | 148           | 168   |
| Total | 51        | 211           | 262   |

**(E)** *RAD21* ( $p = 0.0003$ )

|                | <b>Amplified</b> | <b>Not Amplified</b> | <b>Total</b> |
|----------------|------------------|----------------------|--------------|
| <b>&lt; 55</b> | 36               | 58                   | 94           |
| <b>≥ 55</b>    | 29               | 139                  | 168          |
| <b>Total</b>   | 65               | 197                  | 262          |

**(F)** *EXT1* ( $p = 0.0001$ )

|                | <b>Amplified</b> | <b>Not Amplified</b> | <b>Total</b> |
|----------------|------------------|----------------------|--------------|
| <b>&lt; 55</b> | 39               | 55                   | 94           |
| <b>≥ 55</b>    | 32               | 136                  | 168          |
| <b>Total</b>   | 71               | 191                  | 262          |

**(G)** *RECQL4* ( $p = 0.0002$ )

|                | <b>Amplified</b> | <b>Not Amplified</b> | <b>Total</b> |
|----------------|------------------|----------------------|--------------|
| <b>&lt; 55</b> | 45               | 49                   | 94           |
| <b>≥ 55</b>    | 41               | 127                  | 168          |
| <b>Total</b>   | 86               | 176                  | 262          |

**(H)** *KRAS* ( $p = 0.5480$ )

|                | <b>Amplified</b> | <b>Not Amplified</b> | <b>Total</b> |
|----------------|------------------|----------------------|--------------|
| <b>&lt; 55</b> | 9                | 85                   | 94           |
| <b>≥ 55</b>    | 21               | 147                  | 168          |
| <b>Total</b>   | 30               | 232                  | 262          |

I) *PRKACA* ( $p = 0.1137$ )

|       | Amplified | Not Amplified | Total |
|-------|-----------|---------------|-------|
| < 55  | 7         | 87            | 94    |
| ≥ 55  | 24        | 144           | 168   |
| Total | 31        | 231           | 262   |

(J) *BRD4* ( $p = 0.4320$ )

|       | Amplified | Not Amplified | Total |
|-------|-----------|---------------|-------|
| < 55  | 9         | 85            | 94    |
| ≥ 55  | 23        | 145           | 168   |
| Total | 32        | 230           | 262   |

K) *TPM4* ( $p = 0.5322$ )

|       | Amplified | Not Amplified | Total |
|-------|-----------|---------------|-------|
| < 55  | 8         | 86            | 94    |
| ≥ 55  | 20        | 148           | 168   |
| Total | 28        | 234           | 262   |

**Table S5: Contingency Tables for Association with Disease Stage.**

A. *TBL1XR1*; B. *PIK3CA*; C. *UBR5*; D. *EIF3E*; E. *RAD21*; F. *EXT1*; G. *RECQL4*; H. *KRAS*; I. *PRKACA*; J. *BRD4*; K. *TPM4*

**(A) *TBL1XR1*** ( $p = 1.000$ )

|             | Amplified | Not Amplified | Total |
|-------------|-----------|---------------|-------|
| Early Stage | 1         | 16            | 17    |
| Late Stage  | 27        | 226           | 253   |
| Total       | 28        | 242           | 270   |

**(B) *PIK3CA*** ( $p = 1.000$ )

|             | Amplified | Not Amplified | Total |
|-------------|-----------|---------------|-------|
| Early Stage | 4         | 13            | 17    |
| Late Stage  | 56        | 197           | 253   |
| Total       | 60        | 210           | 270   |

**(C) *UBR5*** ( $p = 0.4816$ )

|             | Amplified | Not Amplified | Total |
|-------------|-----------|---------------|-------|
| Early Stage | 1         | 16            | 17    |
| Late Stage  | 37        | 216           | 253   |
| Total       | 38        | 232           | 270   |

**(D)** *EIF3E* ( $p = 0.2104$ )

|             | Amplified | Not Amplified | Total |
|-------------|-----------|---------------|-------|
| Early Stage | 1         | 16            | 17    |
| Late Stage  | 50        | 203           | 253   |
| Total       | 51        | 219           | 270   |

**(E)** *RAD21* ( $p = 0.7707$ )

|             | Amplified | Not Amplified | Total |
|-------------|-----------|---------------|-------|
| Early Stage | 3         | 14            | 17    |
| Late Stage  | 63        | 190           | 253   |
| Total       | 66        | 204           | 270   |

**(F)** *EXT1* ( $p = 0.5722$ )

|             | Amplified | Not Amplified | Total |
|-------------|-----------|---------------|-------|
| Early Stage | 3         | 14            | 17    |
| Late Stage  | 69        | 184           | 253   |
| Total       | 72        | 198           | 270   |

**(G)** *RECQL4* ( $p = 0.5947$ )

|             | Amplified | Not Amplified | Total |
|-------------|-----------|---------------|-------|
| Early Stage | 4         | 13            | 17    |
| Late Stage  | 85        | 168           | 253   |
| Total       | 89        | 181           | 270   |

**(H)** *KRAS* ( $p = 1.000$ )

|             | Amplified | Not Amplified | Total |
|-------------|-----------|---------------|-------|
| Early Stage | 2         | 15            | 17    |
| Late Stage  | 29        | 224           | 253   |
| Total       | 31        | 239           | 270   |

**(I)** *PRKACA* ( $p = 0.7026$ )

|             | Amplified | Not Amplified | Total |
|-------------|-----------|---------------|-------|
| Early Stage | 1         | 16            | 17    |
| Late Stage  | 30        | 223           | 253   |
| Total       | 31        | 239           | 270   |

**(J)** *BRD4* (p = 0.2362)

|                    | <b>Amplified</b> | <b>Not Amplified</b> | <b>Total</b> |
|--------------------|------------------|----------------------|--------------|
| <b>Early Stage</b> | 0                | 17                   | 17           |
| <b>Late Stage</b>  | 32               | 221                  | 253          |
| <b>Total</b>       | 32               | 238                  | 270          |
